# Supplementary material for: Very long-/ and long Chain-3-Hydroxy Acyl CoA Dehydrogenase Deficiency correlates with deregulation of the mitochondrial fusion/fission machinery
Source: PubMed Central journal article supplement (PMC5818531; doi:10.1038/s41598-018-21519-2), 2018-02-19

## Supplementary Information

### **Very long-/ and long Chain-3-Hydroxy Acyl CoA Dehydrogenase Deficiency correlates with deregulation of the mitochondrial fusion/fission machinery**

Judith Hagenbuchner<sup>1</sup>, Sabine Scholl-Bürigi<sup>2</sup>, Daniela Karall<sup>2\*</sup>, and Michael J. Ausserlechner<sup>2\*</sup>

<sup>1</sup>Departments of Pediatrics II and <sup>2</sup>Pediatrics I, Medical University Innsbruck, Innsbruck, Austria

\*corresponding authors

**Supplemental Figure 1: Original uncropped blots**

**A) Analyses of Fusion/Fission proteins in LCHADD/VLCADD patients  
PANEL 1:**

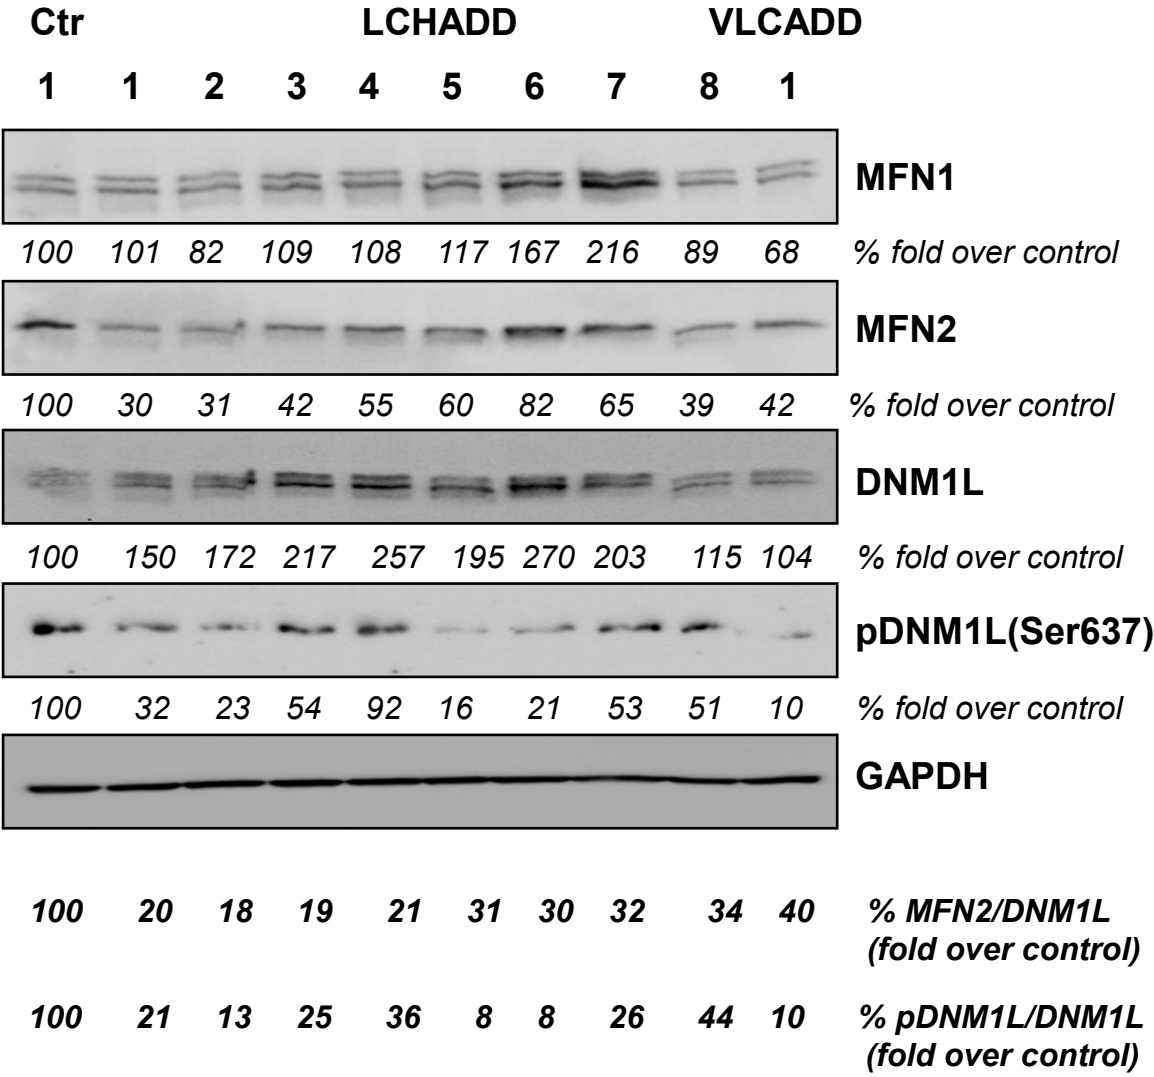

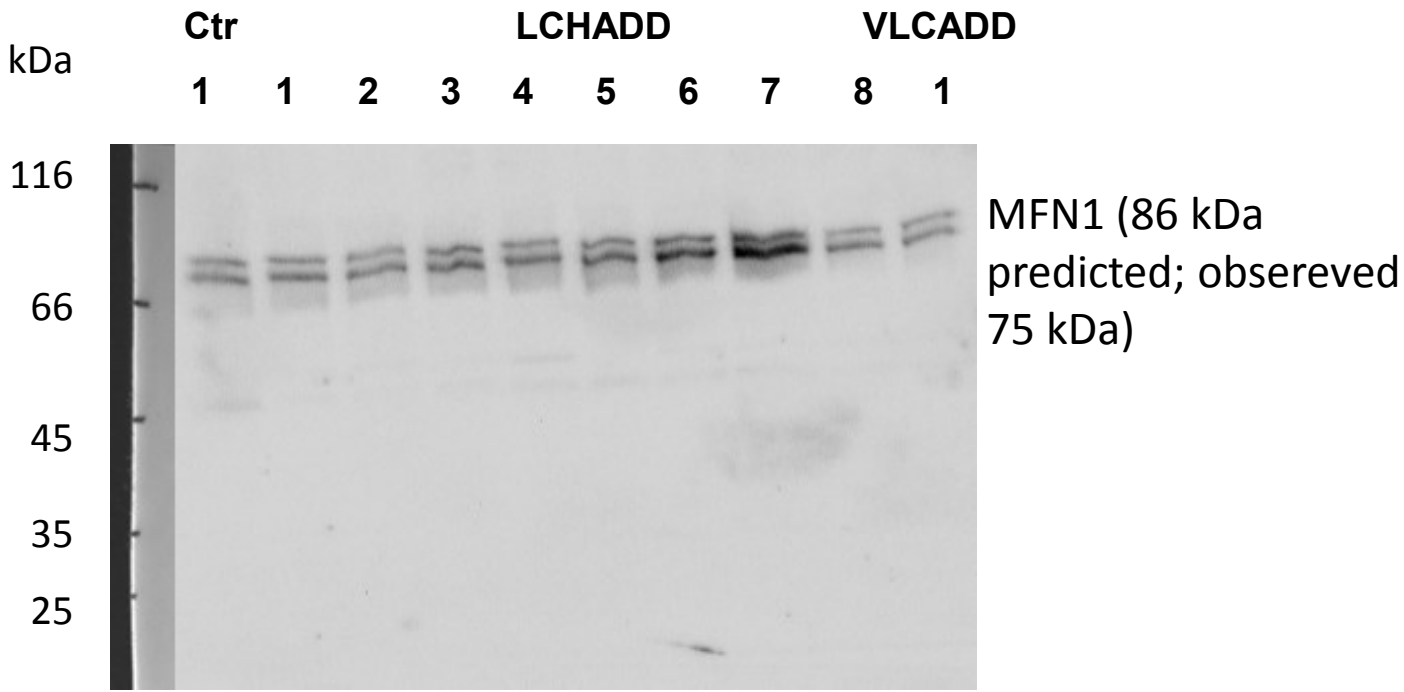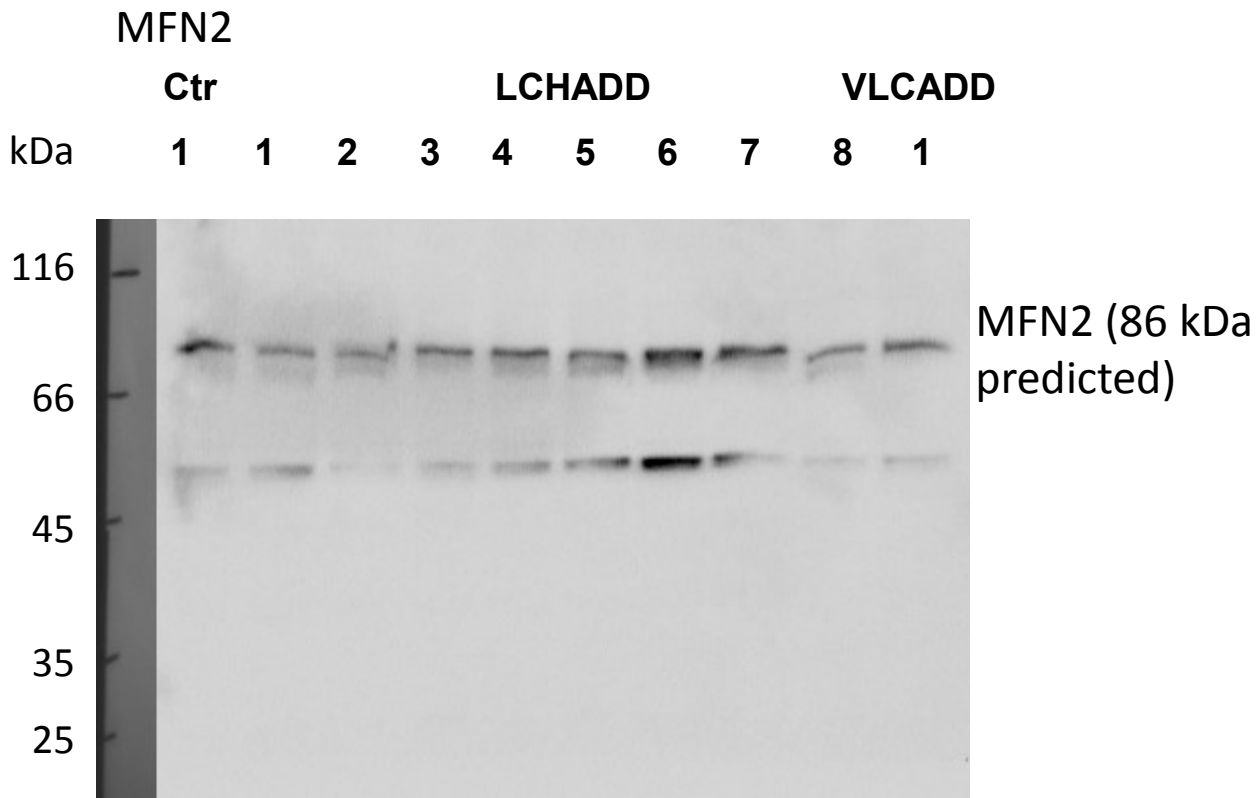

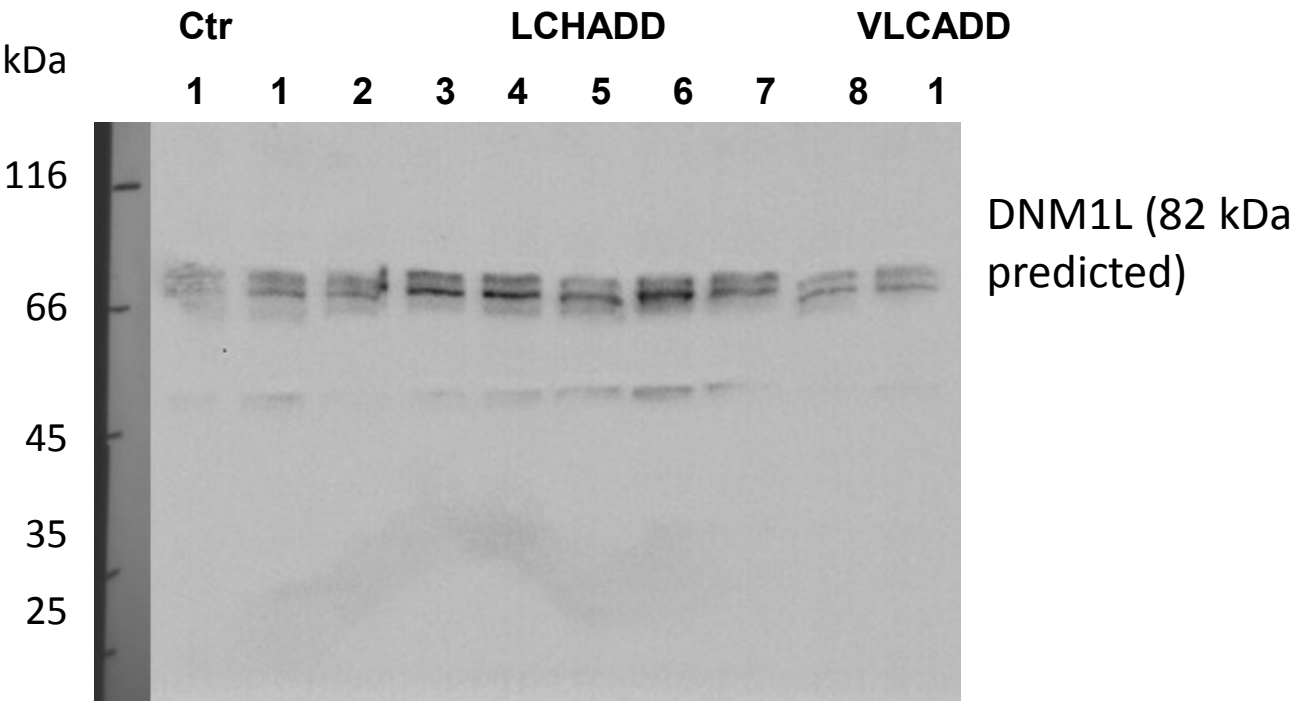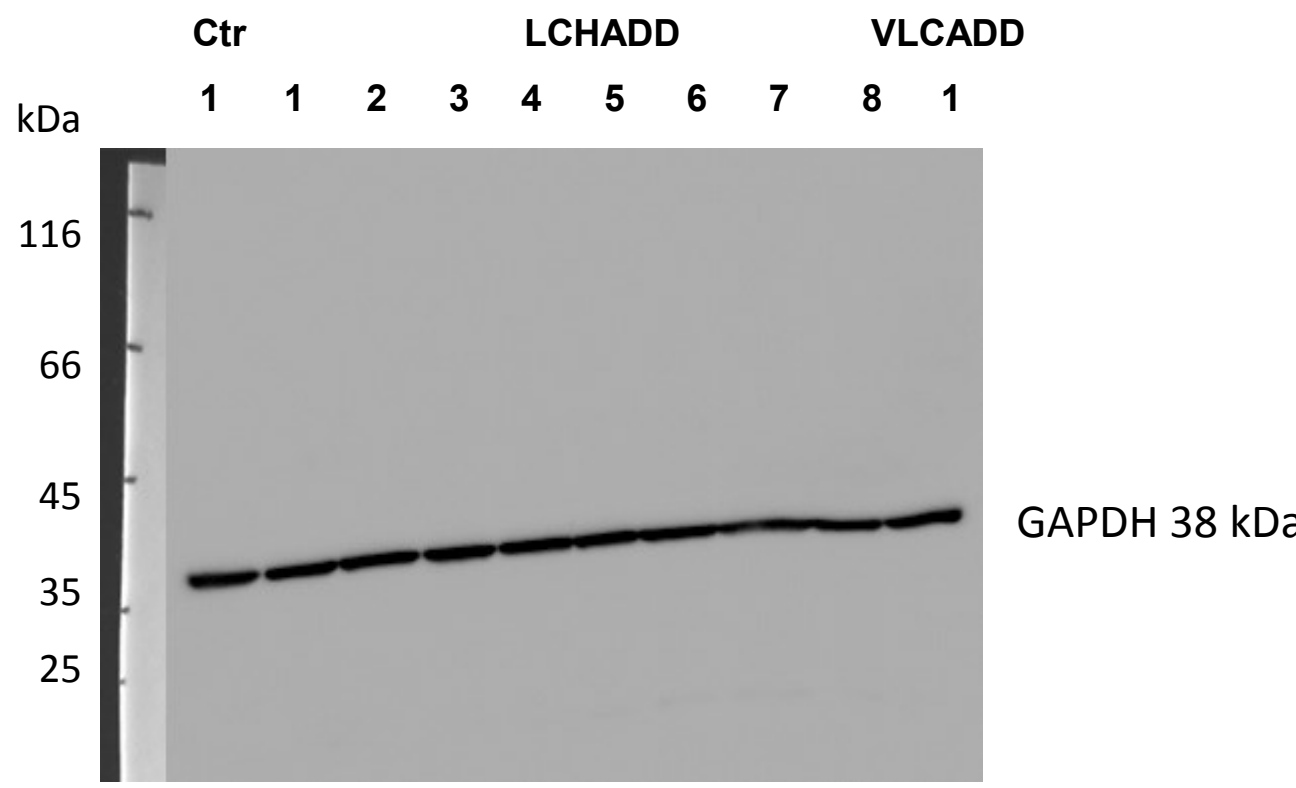

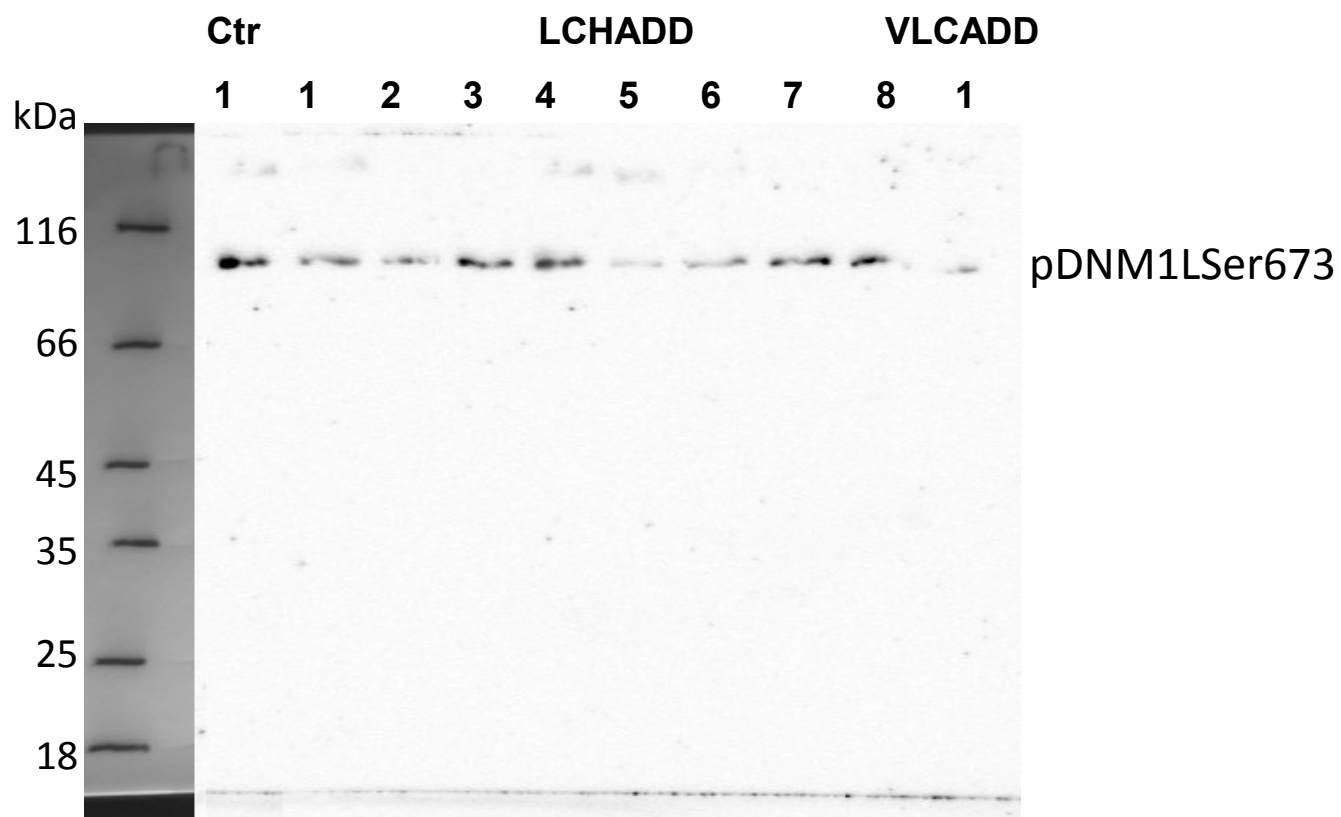

**Analyses of Fusion/Fission proteins in LCHADD/VLCADD patients  
PANEL 2:**

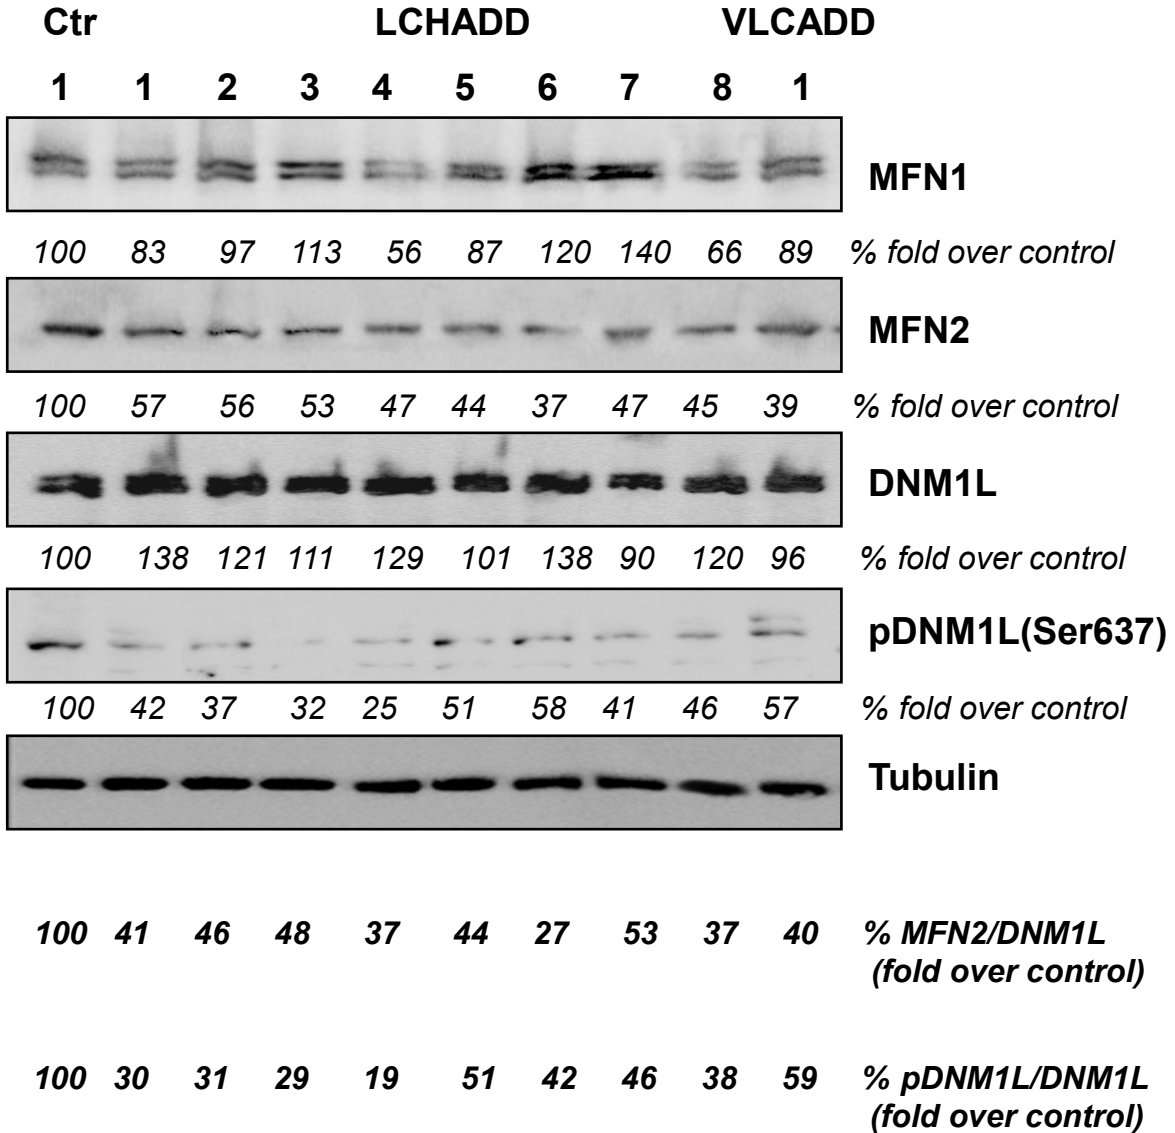

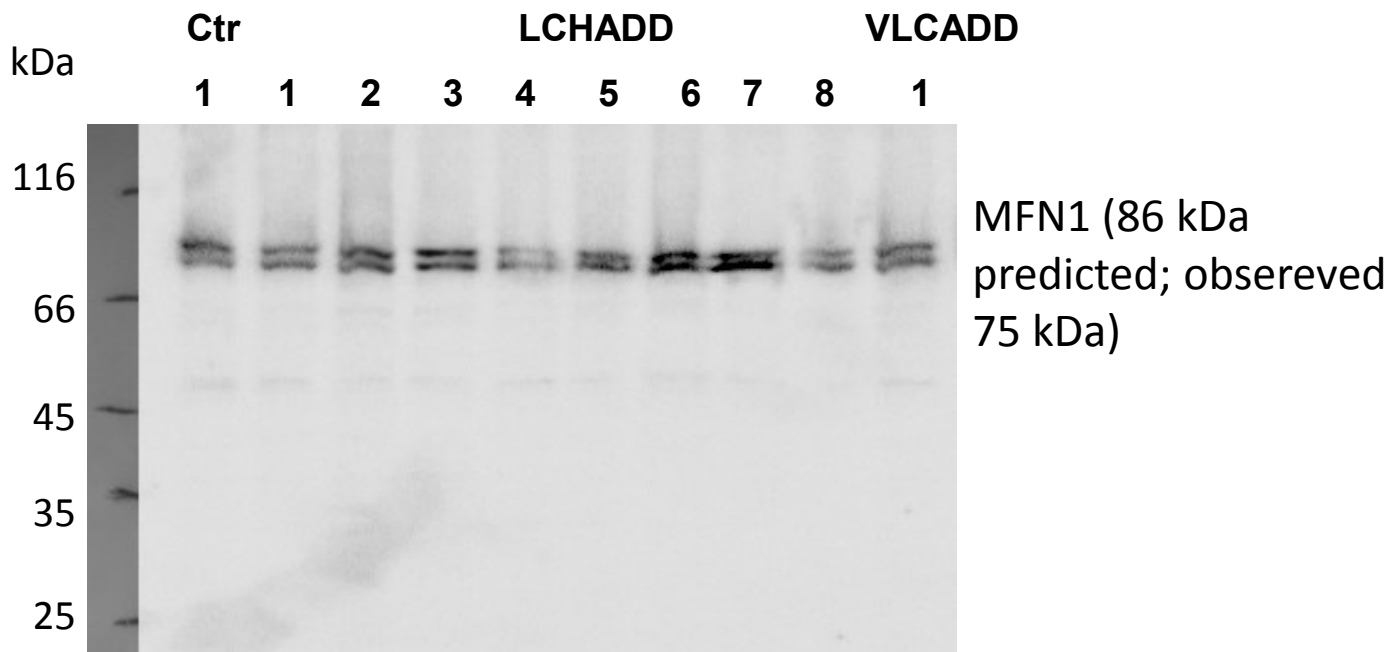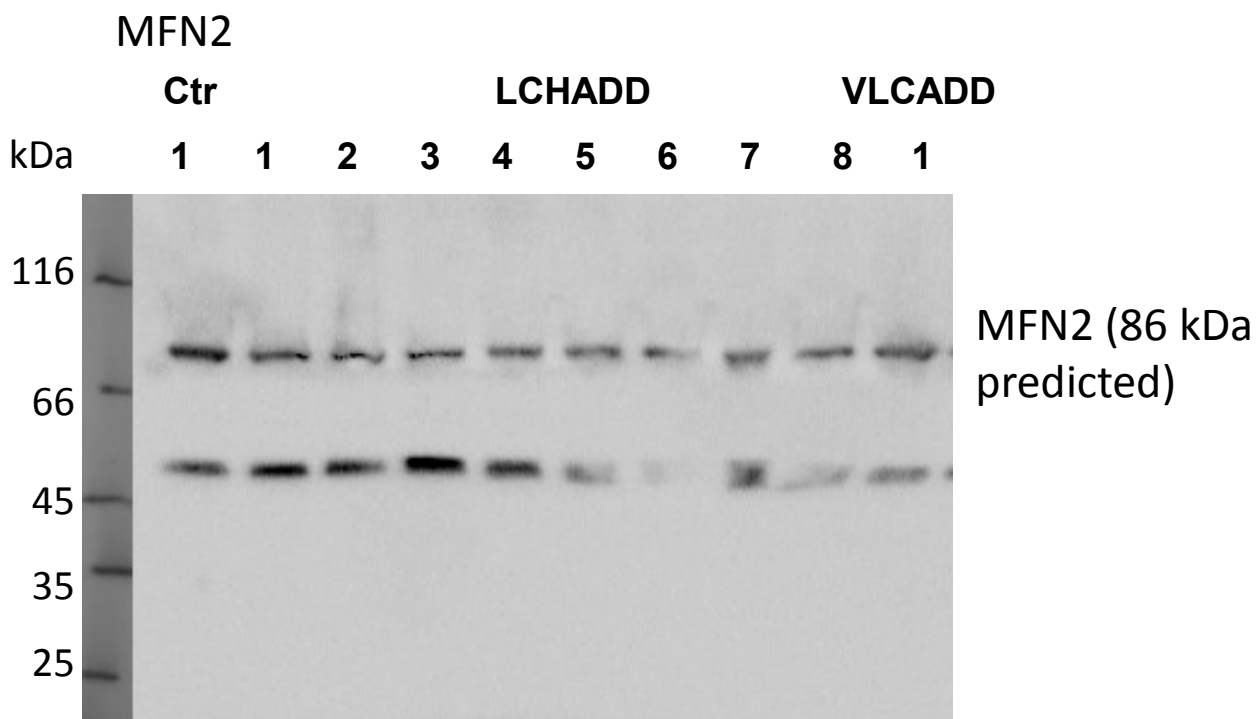

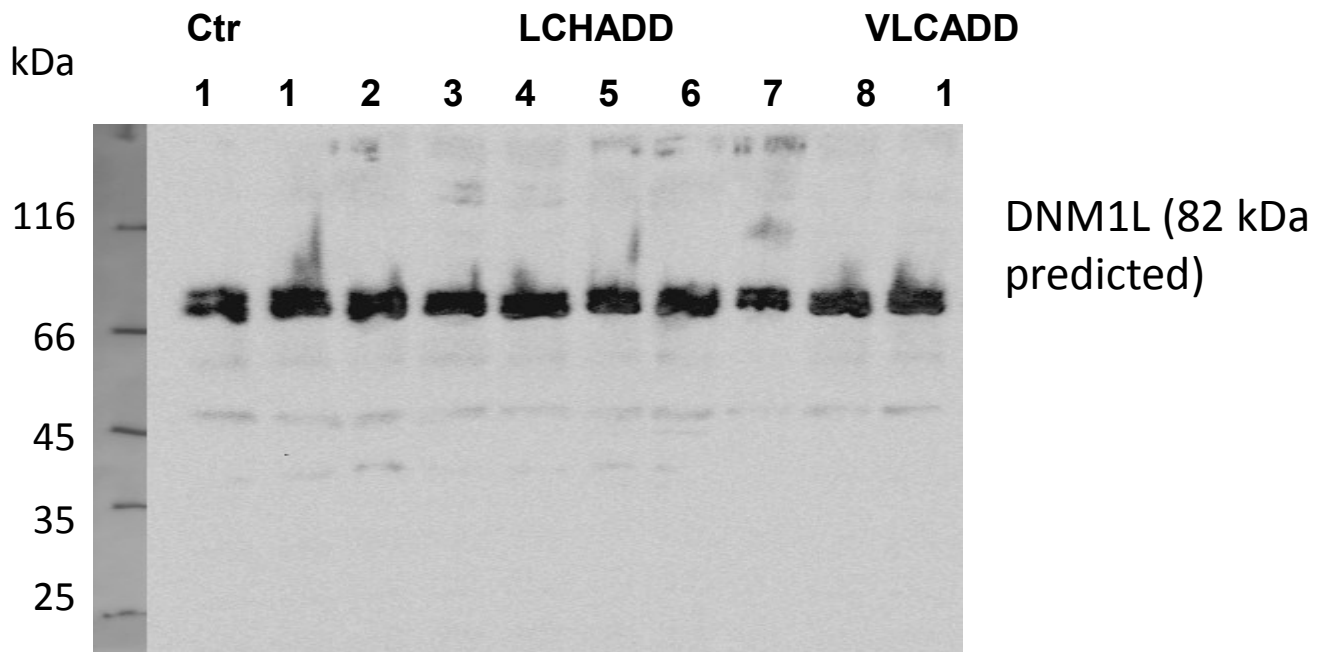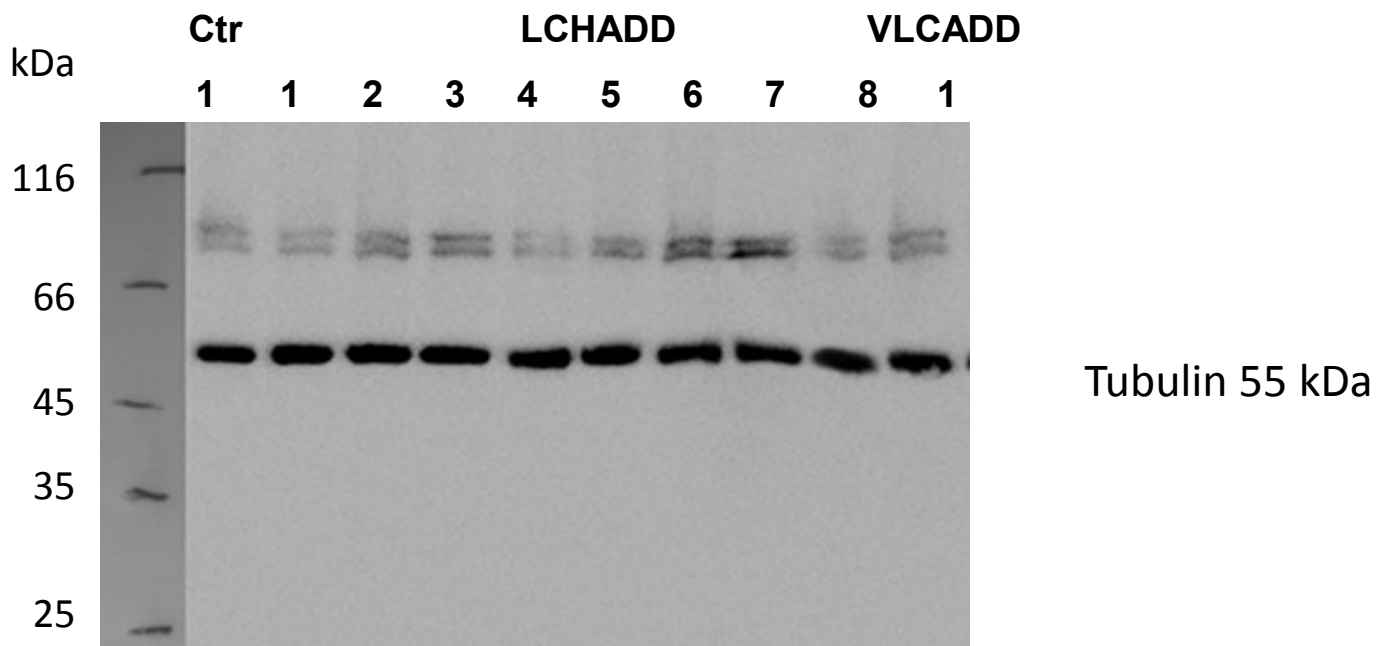



**Ctrl**

**LCHADD**

**VLCADD**

**1**

**1**

**2**

**3**

**4**

**5**

**6**

**7**

**8**

**1**

kDa

116

66

45

35

25

18

pDNM1LSer673

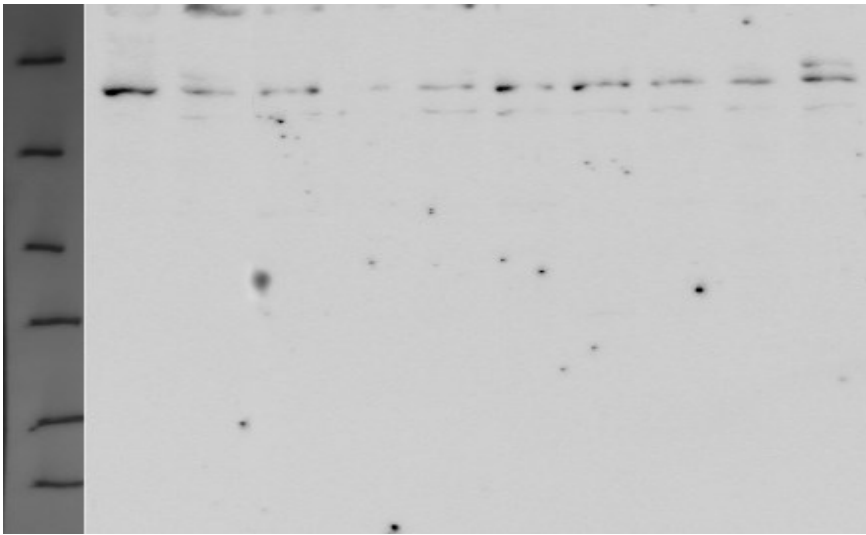

**Analyses of Fusion/Fission proteins in LCHADD/VLCADD patients  
PANEL 3:**

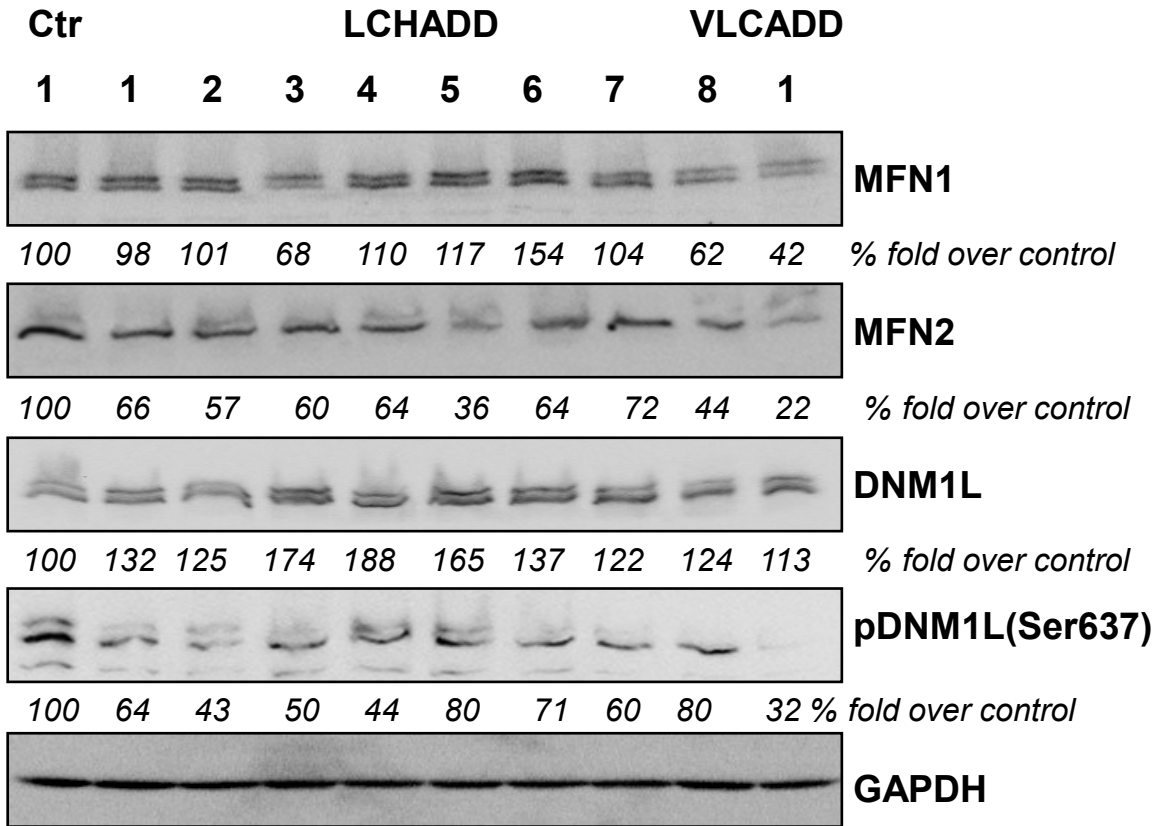

100 50 45 35 29 22 47 60 36 20 % MFN2/DNM1L  
(fold over control)

100 48 34 29 24 48 52 49 64 28 % pDNM1L/DNM1L  
(fold over control)

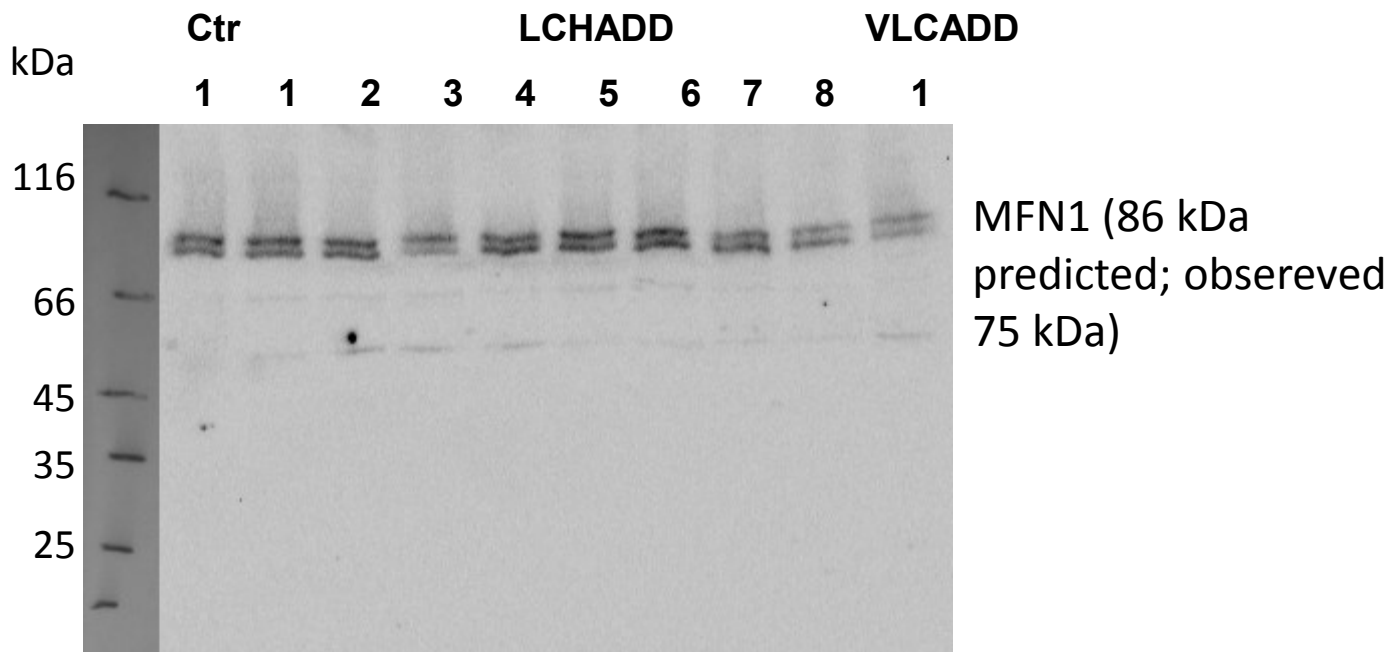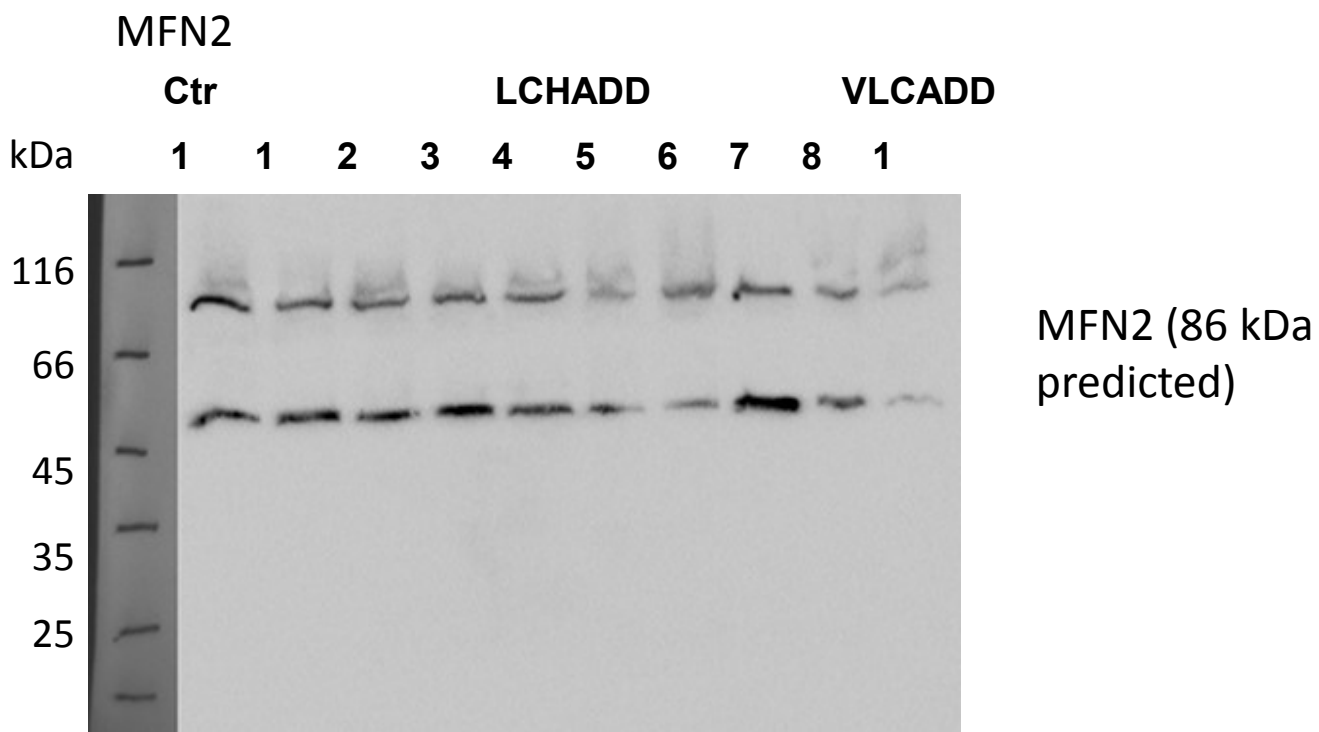

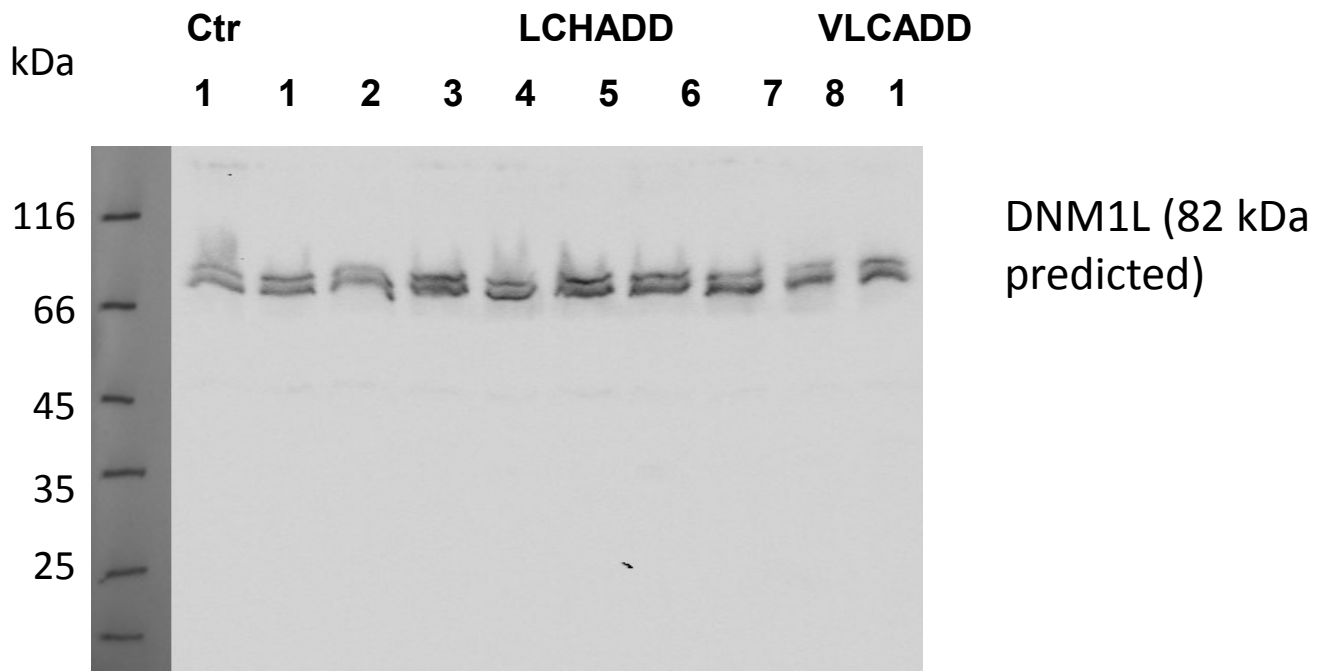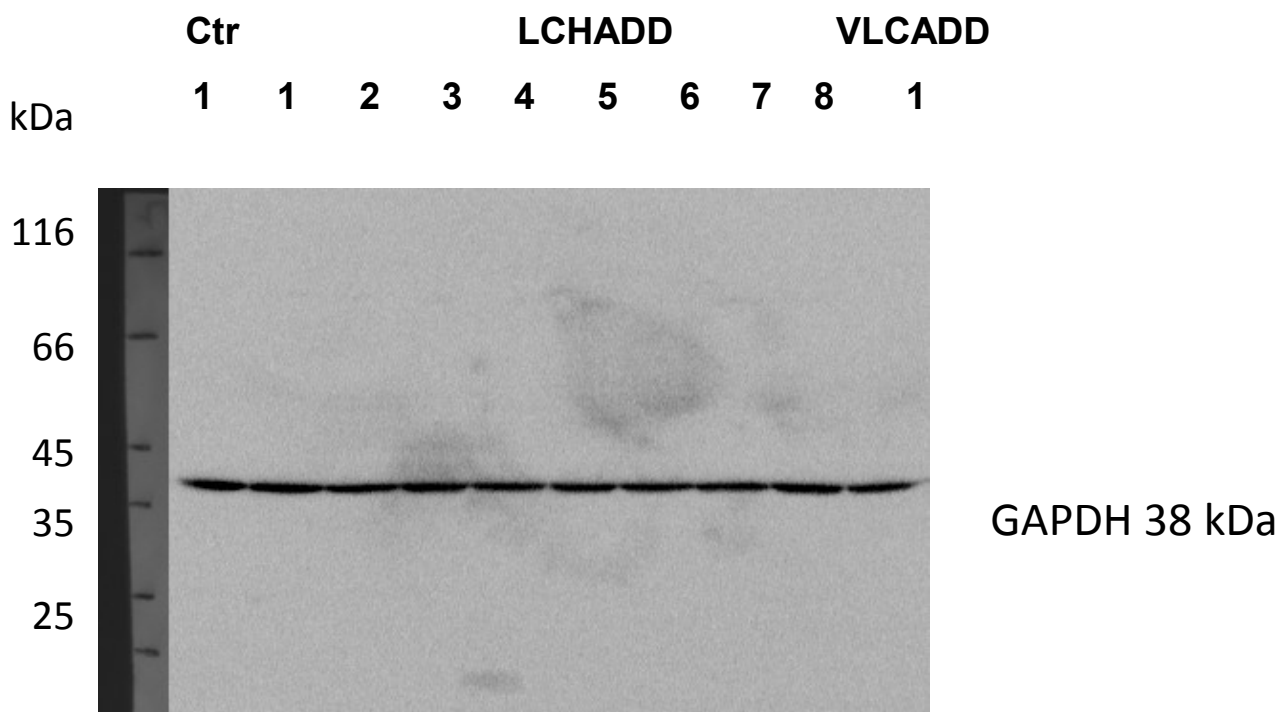

**Ctrl**

**LCHADD**

**VLCADD**

**1 1 2 3 4 5 6 7 8 1**

kDa

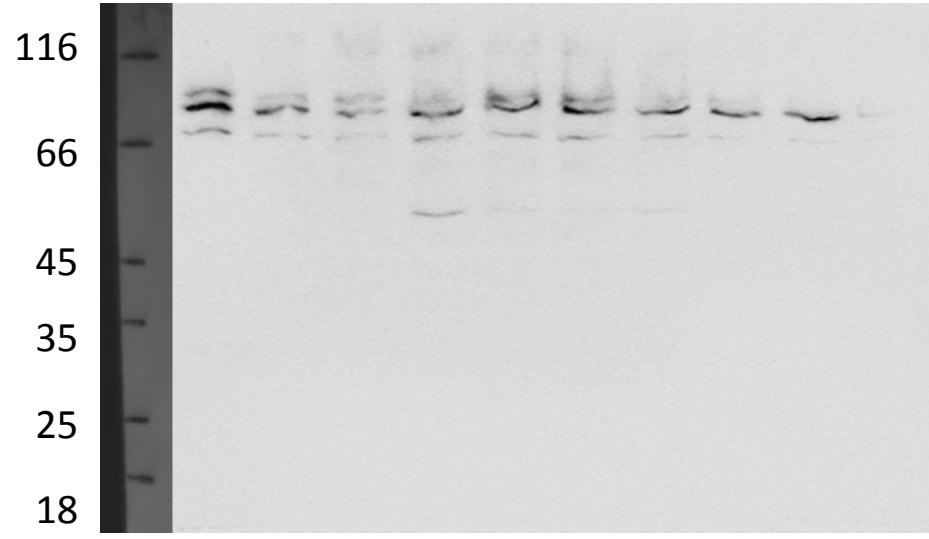

pDNM1LSer673

**B) Analyses of OXPHOS in LCHADD/VLCADD patients:**

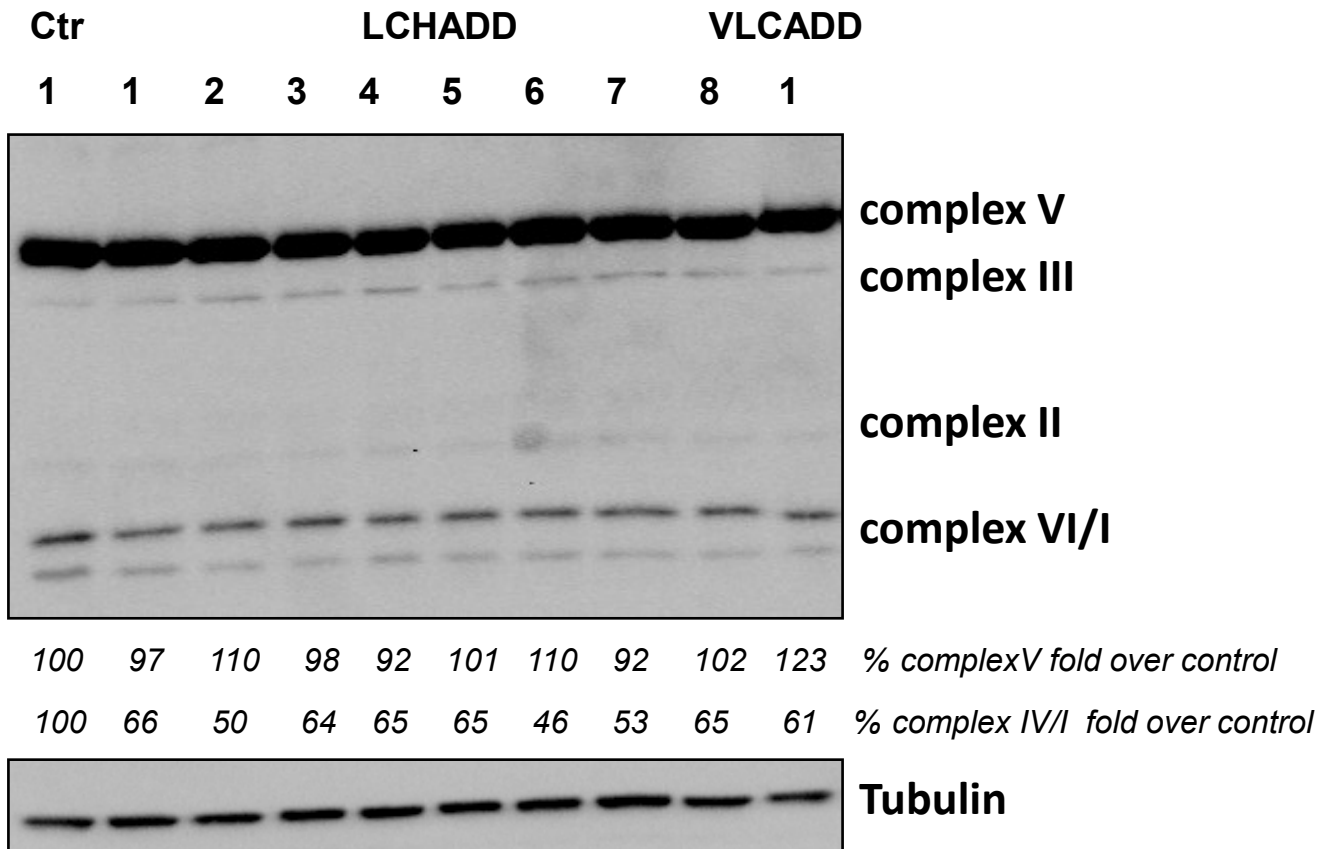

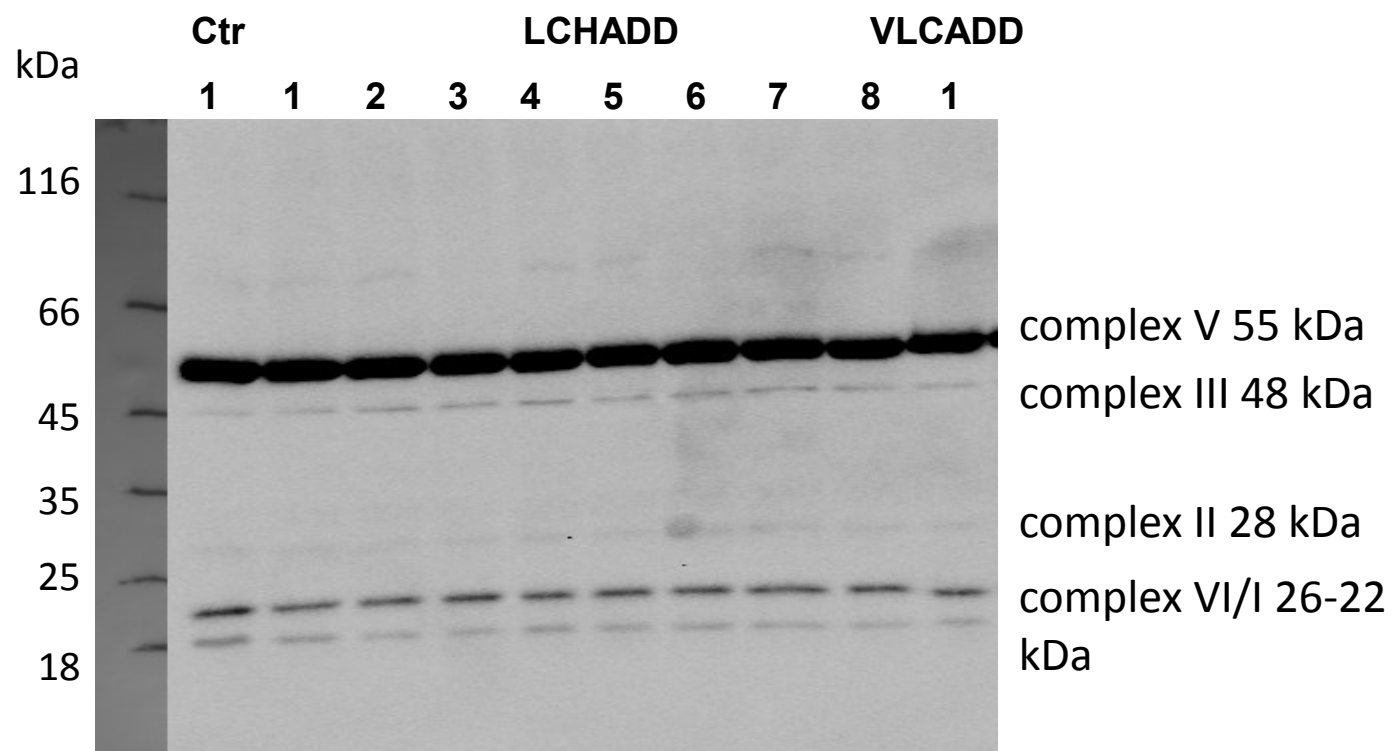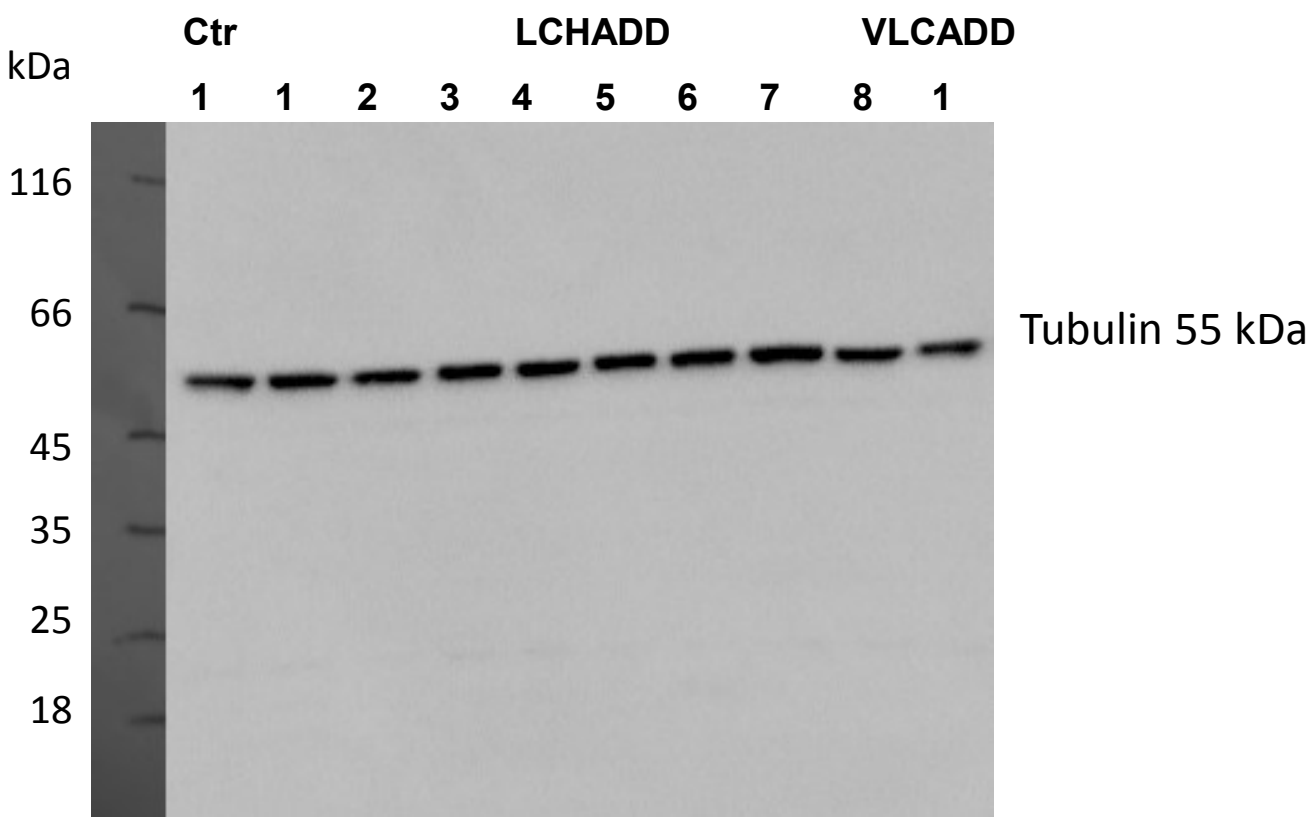

**Analyses of OXPHOS in LCHADD/VLCADD patients PANEL 2:**

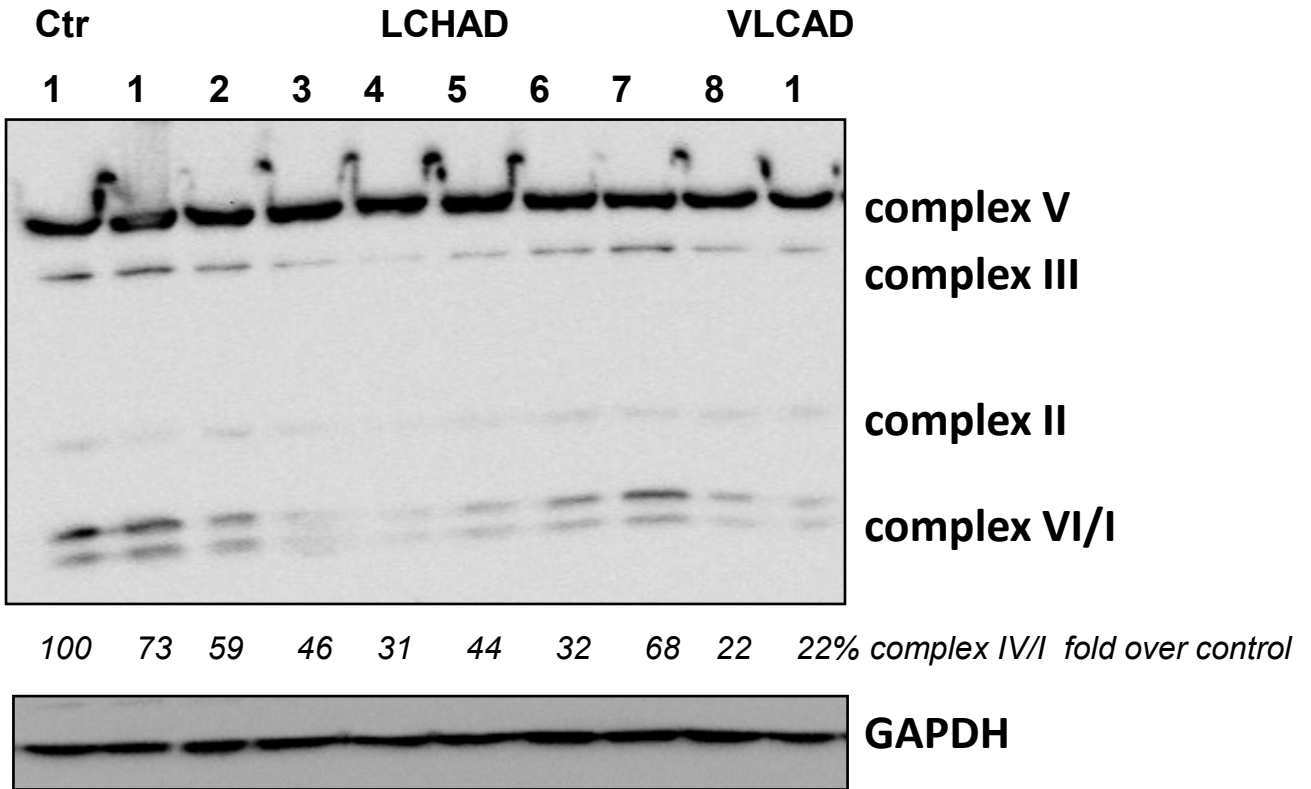



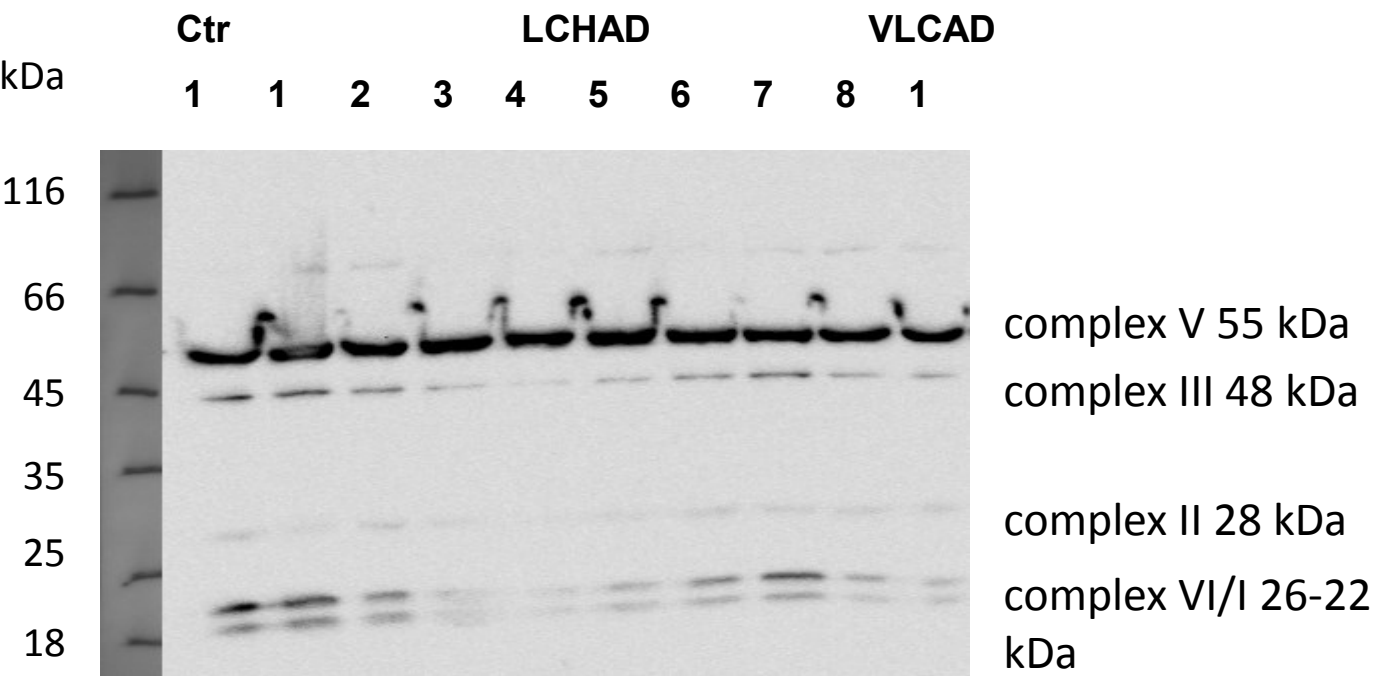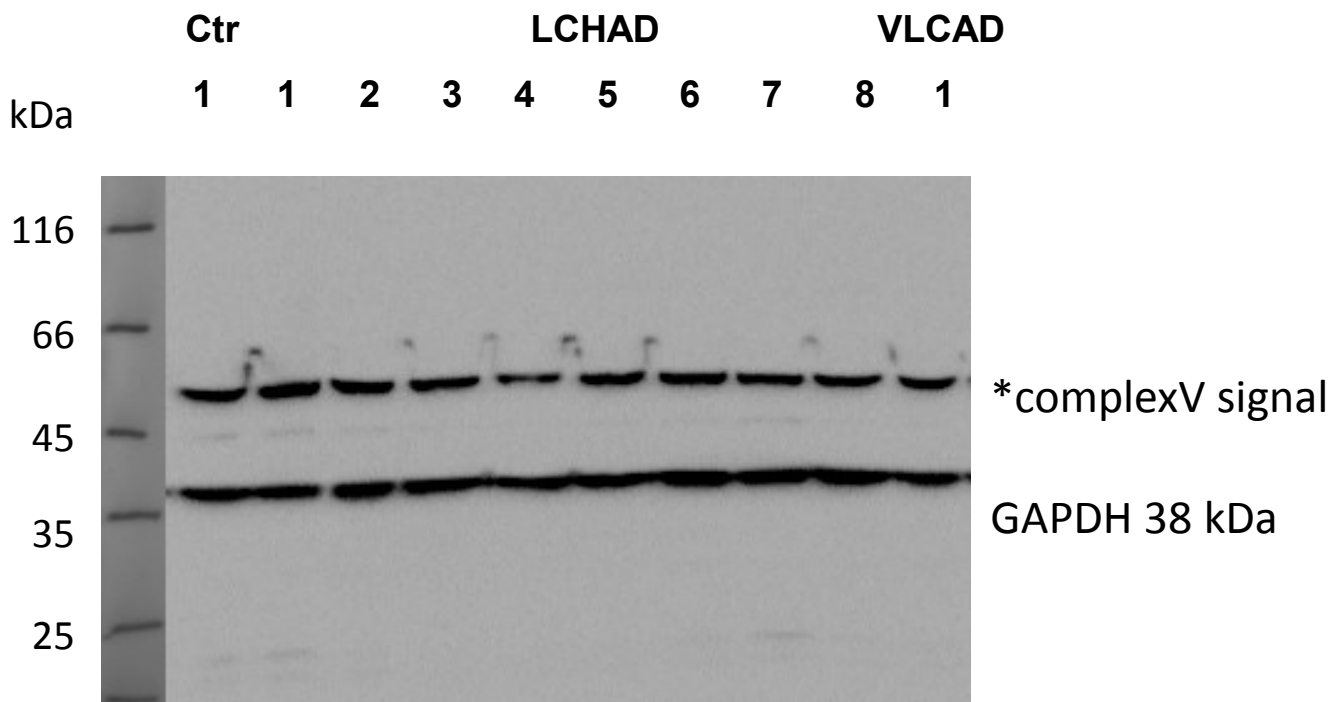

### Analyses of OXPPOS in LCHADD/VLCADD patients PANEL 3:

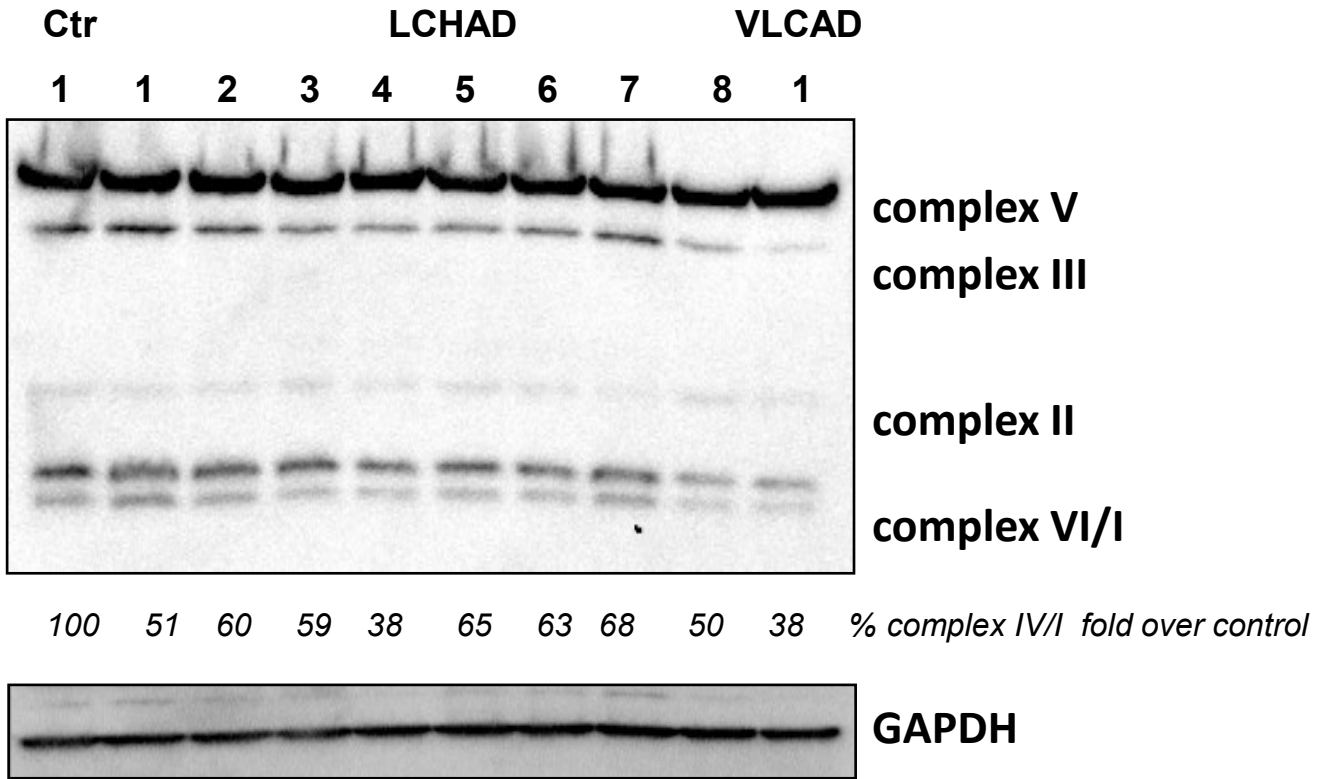

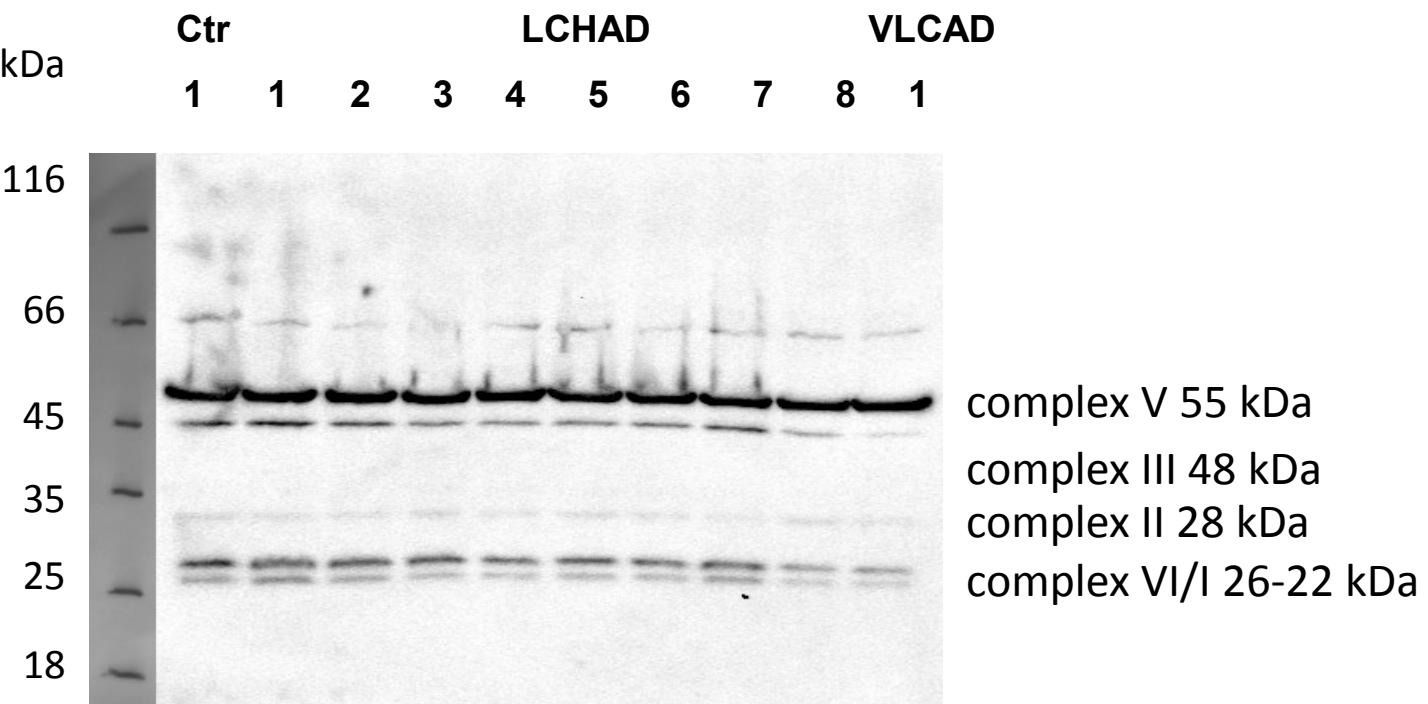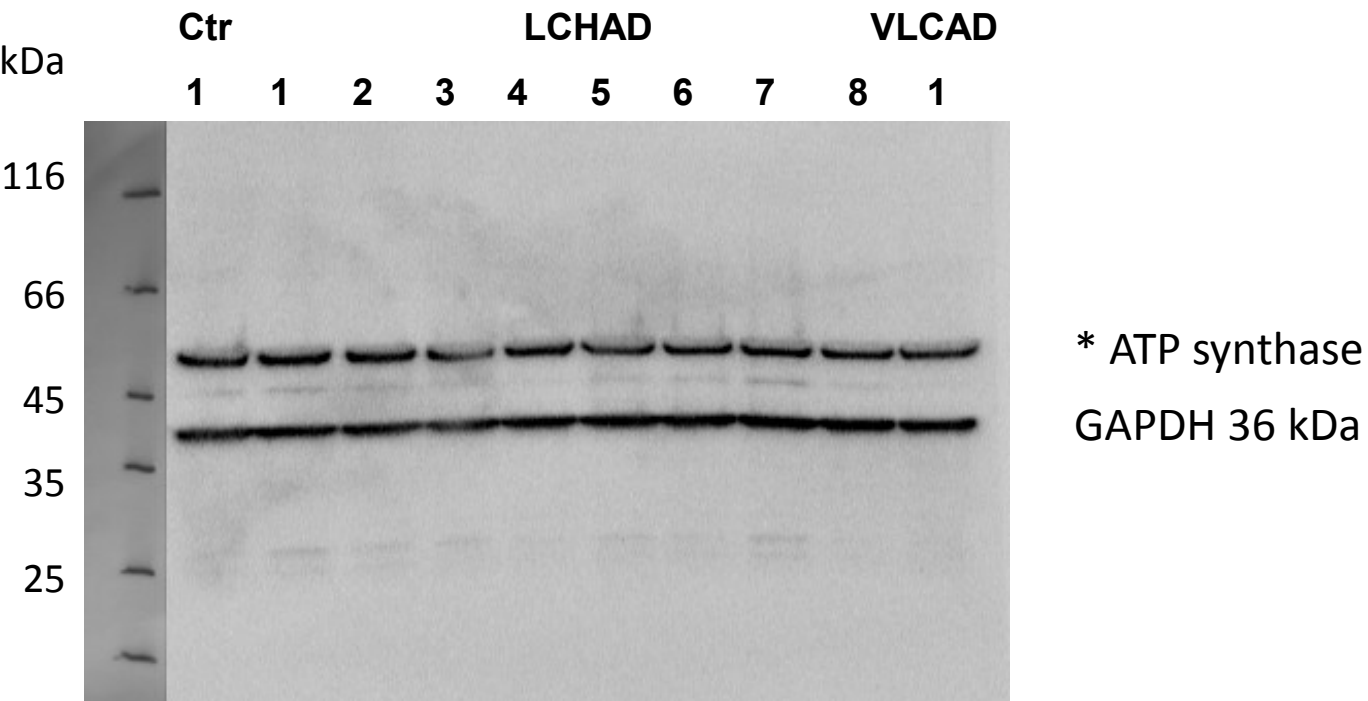

Supplement: 41598_2018_21519_MOESM1_ESM.pdf [file 41598_2018_21519_MOESM1_ESM.pdf]
